RESEARCH ARTICLE

# The Toll Signaling Pathway in the Chinese Oak Silkworm, *Antheraea pernyi*: Innate Immune Responses to Different Microorganisms

Ying Sun<sup>1,2</sup>, Yiren Jiang<sup>2</sup>, Yong Wang<sup>2</sup>, Xisheng Li<sup>1,3</sup>, Ruisheng Yang<sup>2</sup>, Zhiguo Yu<sup>1\*</sup>, Li Qin<sup>1,2\*</sup>

**1** College of Plant Protection, Shenyang Agricultural University, Shenyang, 110866, China, **2** College of Bioscience and Biotechnology, Liaoning Engineering & Technology Research Center for Insect Resources, Shenyang Agricultural University, Shenyang, 110866, China, **3** Sericultural Research Institute of Liaoning Province, Fengcheng, 118100, China

☞ These authors contributed equally to this work.

\* [yu\\_zhiguo2012@163.com](mailto:yu_zhiguo2012@163.com) (ZY); [qinli1963@163.com](mailto:qinli1963@163.com) (LQ)

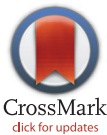

**OPEN ACCESS**

**Citation:** Sun Y, Jiang Y, Wang Y, Li X, Yang R, Yu Z, et al. (2016) The Toll Signaling Pathway in the Chinese Oak Silkworm, *Antheraea pernyi*: Innate Immune Responses to Different Microorganisms. PLoS ONE 11(8): e0160200. doi:10.1371/journal.pone.0160200

**Editor:** Erjun Ling, Institute of Plant Physiology and Ecology, CHINA

**Received:** March 4, 2016

**Accepted:** July 16, 2016

**Published:** August 2, 2016

**Copyright:** © 2016 Sun et al. This is an open access article distributed under the terms of the [Creative Commons Attribution License](https://creativecommons.org/licenses/by/4.0/), which permits unrestricted use, distribution, and reproduction in any medium, provided the original author and source are credited.

**Data Availability Statement:** All relevant data are within the paper and its Supporting Information files.

**Funding:** This work was partially supported by the National Modern Agriculture Industry Technology System Construction Project (Silkworm and Mulberry) and the Magnitude Science and Technology Projects of Liaoning Province to LQ; the Cultivation Plan for Youth Agricultural Science and Technology Innovative Talents of Liaoning Province (2014040) and the Scientific Research Project for the Education Department of Liaoning Province (L2014255) to YJ; and the Scientific Research Project for Education

## Abstract

The Toll pathway is one of the most important signaling pathways regulating insect innate immunity. Spatzle is a key protein that functions as a Toll receptor ligand to trigger Toll-dependent expression of immunity-related genes. In this study, a novel *spatzle* gene (*ApSPZ*) from the Chinese oak silkworm *Antheraea pernyi* was identified. The *ApSPZ* cDNA is 1065 nucleotides with an open reading frame (ORF) of 777 bp encoding a protein of 258 amino acids. The protein has an estimated molecular weight of 29.71 kDa and an isoelectric point (PI) of 8.53. *ApSPZ* is a nuclear and secretory protein with no conserved domains or membrane helices and shares 40% amino acid identity with *SPZ* from *Manduca sexta*. Phylogenetic analysis indicated that *ApSPZ* might be a new member of the Spatzle type 1 family, which belongs to the Spatzle superfamily. The expression patterns of several genes involved in the Toll pathway were examined at different developmental stages and various tissues in 5th instar larvae. The examined targets included *A. pernyi spatzle*, *GNBP*, *MyD88*, *Tolloid*, *cactus* and *dorsalA*. The RT-PCR results showed that these genes were predominantly expressed in immune-responsive fat body tissue, indicating that the genes play a crucial role in *A. pernyi* innate immunity. Moreover, *A. pernyi* infection with the fungus *Nosema pernyi* and the gram-positive bacterium *Enterococcus pernyi*, but not the gram-negative bacterium *Escherichia coli*, activated the Toll signaling pathway. These results represent the first study of the Toll pathway in *A. pernyi*, which provides insight into the *A. pernyi* innate immune system.

Department of Liaoning Province (L2015488) to YW. The funders had no role in the study design, data collection and analysis, decision to publish, or preparation of the manuscript.

**Competing Interests:** The authors have declared that no competing interests exist.

## Introduction

The Toll pathway is one of the most important signaling pathways regulating insect innate immunity. Various studies have shown that Toll signaling plays a crucial role in insect innate immunity to microbial infections in flies [1], silkworm [2], and tobacco hornworm [3]. It has been shown that the Toll pathway mediates the production of antimicrobial peptides in response to infection with gram-positive bacteria or fungi. Moreover, Toll signaling is important to the antiviral response and is required for efficient inhibition of *Drosophila* X virus replication and for resistance to oral infection with the *Drosophila* C virus in *Drosophila* [4,5].

However, there is limited information on the Toll signaling pathway in *Antheraea pernyi*. The Chinese oak silkworm (*Antheraea pernyi* Guérin-Méneville, 1855; Lepidoptera: Saturniidae) is a well-known wild silkworm used for insect food and silk production. Chinese farmers developed rearing methods for the Chinese oak silkworm approximately 400 years ago [6]. Currently, the Chinese annual output of tussah cocoons is approximately  $8 \times 10^4$  t, which is nearly 90% of the total output of wild silk worldwide, and the income from tussah rearing has become the main economic source in many sericultural areas. There are approximately one hundred twenty tussah varieties in China, and they can be divided into four races based on larval skin color: yellow, yellow-cyan, white, and blue [7]. Currently, the products from *A. pernyi*, such as silk, pupae and moths, are used in many fields. For example, tussah silk fibroin nanoparticles have been used as a sustained drug delivery vehicle [8], and tussah pupae homogenates were used to enhance the gelation properties of surimi from yellowtail seabream [9]. Therefore, the use of tussah products is common and wide-ranging. With new developments in biotechnology, more attention has been paid to the functional genes of *A. pernyi*, and several genes from *A. pernyi* have been isolated and characterized [10,11].

There are significant differences between the domestic silkworm (*Bombyx mori*) and the Chinese oak silkworm (*A. pernyi*). Unlike the domestic silkworm, *A. pernyi* larvae are fed on the leaves of oak trees in tussah-feeding oak forests until cocooning during the larval stage. Therefore, there is a high risk of *A. pernyi* larvae infection by different microorganisms in the wild. Moreover, substantial economic losses in tussah production are associated with different diseases every year. However, it is evident that *A. pernyi* must have immune responses to defend against different microorganisms, as tussah production has lasted for hundreds of years. Different developmental stages of *A. pernyi* and survival conditions of *A. pernyi* larvae are shown in S1 and S2 Figs.

Insects possess an innate immune system that responds to invading microorganisms. In recent years, immune response-related genes have become an important focus of *A. pernyi* research. Fifty immune response-related genes and ten stress response genes were identified from a subtractive cDNA library in *A. pernyi* challenged with *Escherichia coli* [12]. Three small heat shock proteins (sHSPs) encoding HSP21, HSP21.4 and HSP20.8 (named as *Ap-sHSP21*, *Ap-sHSP21.4* and *Ap-sHSP20.8*, respectively) were isolated from *A. pernyi*. Further studies have shown that these sHSPs might play important roles in *A. pernyi* upon challenge with different microorganisms or under stress conditions [13–15]. Expression of an apolipoprotein-III (*ApoLp-III*) gene from *A. pernyi* pupae (*Ap-ApoLp-III*) was significantly up-regulated in response to different microorganisms, and RNA interference showed that *Ap-ApoLp-III* might function in the *A. pernyi* innate immune system [16].

Previous studies of *A. pernyi* innate immunity have mainly focused on the prophenoloxidase (pro-PO) system. It has been reported that lectin increases in response to the intrusion of foreign substances in *A. pernyi* [17]. In *A. pernyi*, The  $\beta$ -1,3-glucan recognition protein (*Ap- $\beta$ GRP*) and lectin-5 (*Aplectin-5*) were induced by all microorganisms, including *Bacillus subtilis*, *E. coli*, *Antheraea pernyi* nuclear polyhedrosis virus (*ApNPV*) and *Saccharomyces cerevisiae*,

whereas *A. pernyi* C-type lectin 1 was not induced by gram-positive bacteria, and the genes exhibited significantly different expression levels in different tissues. The results suggest that lectins might have various functions in different *A. pernyi* tissues [18]. A 1,3- $\beta$ -D-glucan recognition protein from *A. pernyi* (*Ap- $\beta$ GRP*) that specifically binds 1,3- $\beta$ -D-glucan from yeast but not *E. coli* or *Micrococcus luteus* has been identified, and the presence of both 1,3- $\beta$ -D-glucan and *Ap- $\beta$ GRP* triggered the pro-PO system together but not separately [19]. An *A. pernyi* C-type lectin (*Ap-rCTL*) involved in the pro-PO activating system plays an important role in *A. pernyi* innate immunity as a pattern recognition protein that can recognize and trigger the agglutination of bacteria and fungi [20]. *A. pernyi* prophenoloxidase (*ApPPO*) was also cloned, and *ApPPO* expression was significantly up-regulated in *A. pernyi* tissues following microbial infection. Recombinant *ApPPO* is able to kill bacteria and induce the cecropin transcription in larvae [21]. Additionally, many genes coding for immune proteins from *A. pernyi* have been cloned, such as hemolin [22], which might affect the progress of viral infection in *A. pernyi* [23].

In *A. pernyi*, many immune genes involved in the Toll signaling pathway have been isolated, although there is limited information about Toll signaling in this organism. Two Rel/NF- $\kappa$ B-related genes, *ApdorsalA* and *ApdorsalB*, were cloned from *A. pernyi*. The cloned genes were differentially expressed in response to different microorganisms, indicating that *Apdorsal* might be involved in the immune response to viruses, fungi and gram-positive bacteria in *A. pernyi* [24]. Although the sequences of many genes involved in the *A. pernyi* Toll pathway have been submitted to GenBank, including GGBP (accession number: KF725771), MyD88 (accession number: KF670143), Tolloid (accession number: KF670144), and cactus (accession number: KF670142), there has been no report or record of the *spatzle* gene in *A. pernyi* to our knowledge. It is well known that *spatzle* is a key signal transducer for immune responses, a ligand for Toll receptors and a very important functional protein for activating the Toll pathway in response to different microorganisms.

In this study, a novel *spatzle* gene (*ApSPZ*) from the Chinese oak silkworm, *A. pernyi*, was identified while investigating the Toll signaling pathway in response to different microorganisms. Furthermore, the expression patterns of genes involved in the Toll pathway were examined in *A. pernyi* infected with different microorganisms. The results of this analysis provide a foundation for further investigation of the Toll signaling pathway in *A. pernyi*.

## Materials and Methods

### Sample collection and preparation

*Antheraea pernyi* variety *Shenhuang No. 2* was used in this study. The eggs (on the fifth day), fifth instar larvae (on the third day), pupae and moths were frozen in liquid nitrogen and stored at  $-80^{\circ}\text{C}$  until use. The epidermis, silk glands, blood, gonads, Malpighian tubules, fat body, midgut, and muscle were dissected from fifth instar *A. pernyi* larvae, immediately frozen in liquid nitrogen and stored at  $-80^{\circ}\text{C}$  until use. All of the samples were used for RT-PCR.

On the first day, fifth instar larvae were orally administered 20  $\mu\text{L}$  of different microorganisms separately suspended in sterile water, including *E. coli* (Ec,  $1.2 \times 10^7$  bacterial cells/mL), *Enterococcus pernyi* (Ep,  $2.0 \times 10^7$  cells/mL), and *Nosema pernyi* (Np,  $5.0 \times 10^7$  spores/mL), and larvae fed sterile water were used as controls (CK). Fat bodies dissected from different groups were used for RNA extraction 24 h and 48 h after inoculation and were stored at  $-80^{\circ}\text{C}$  for qRT-PCR testing. *A. pernyi* larvae were kept in a rearing chamber at  $23 \pm 2^{\circ}\text{C}$  with  $70 \pm 5\%$  relative humidity and were fed fresh *Quercus mongolica* leaves.

## Total RNA extraction and cDNA synthesis

Total RNA was extracted using TRIzol<sup>®</sup> Reagent (Invitrogen) according to the manufacturer's protocol. RNA degradation and contamination were monitored on 1% agarose gels. The extracted total RNA was quantified using a NanoDrop 2000 UV-Vis Spectrophotometer (Thermo Scientific, USA). First-strand cDNA synthesis was performed using an M-MuLV First Strand cDNA Synthesis Kit (Sangon Biotech, China). The full-length *A. pernyi spatzie* cDNA was cloned using reverse transcription PCR, 5' RACE and 3' RACE. RACE was performed using a 5' RACE system (version 2.0, Invitrogen) and a SMARTer<sup>™</sup> RACE cDNA Amplification Kit (Clontech) according to the user manual. The cDNAs derived from all of the samples were used for gene expression analysis.

## RT-PCR analysis

Reverse transcription-polymerase chain reaction (RT-PCR) was used to analyze gene expression patterns. The cDNA samples were used as templates for RT-PCR amplification. RT-PCR was performed with gene-specific primer pairs (shown in [S1 Table](#)) for each gene. The *A. pernyi actin* gene (GU073316) was used as an internal control to normalize the levels of genes in the Toll pathway using the primers *Apactin*-F (5' -CCAAA GGCCA ACAGA GAGAA GA-3') and *Apactin*-R (5' -CAAGA ATGAG GGCTG GAAGA GA-3') [25]. The total reaction volume was 25  $\mu$ L, and each reaction contained 10 pmol each primer, 0.25 mM each dNTP, 1 $\times$  buffer, 2 mM MgCl<sub>2</sub>, 2.5 units *Taq* DNA polymerase (TaKaRa), and normalized amounts of the cDNA template. PCR was performed as follows: an initial 3 min step at 95°C; 28 cycles of 30 sec at 95°C, 30 sec at 55°C, and 30 sec at 72°C; and a final extension period of 10 min at 72°C. The amplified products were detected on a 1.5% agarose gel with ethidium bromide staining, and Quantity One Version 4.6.2 (Bio-Rad, USA) was used to estimate the intensities of the visualized target band for each target gene compared to the *A. pernyi actin* gene. RT-PCR experiments were performed three times. The RT-PCR products were purified from the gel and sequenced to confirm the specificity of the RT-PCR amplification.

## Quantitative real-time PCR analysis

To examine the *A. pernyi* immune response against different microorganisms, the relative mRNA levels of genes involved in *A. pernyi* immunity were evaluated using quantitative real-time PCR (qRT-PCR). The qRT-PCR amplification was performed using SYBR Premix Ex Taq<sup>™</sup> (TaKaRa, Japan) and a Roche Light Cycler 480 (Hoffmann-La Roche Ltd.). qRT-PCR was performed with the following protocol: initial denaturation at 95°C for 2 min; 40 cycles of 15 s at 95°C, 30 s of annealing at 60°C, and 30 s of extension at 68°C; and a 60–95°C melting curve to analyze the amplified products. The gene-specific primer pairs for qRT-PCR are shown in [S1 Table](#). The *A. pernyi actin* gene (GU073316) was amplified as an internal control to normalize the transcript levels of the genes using *Apactin*-qRT-F (5' -ATGTG CAAGG CCGGT TTC-3') and *Apactin*-qRT-R (5' -TTGCT CTGTG CCTCA TCACC-3'). The relative gene expression levels were calculated using the 2<sup>- $\Delta\Delta$ Ct</sup> method [26]. All of the samples were analyzed in triplicate. Experimental data were analyzed using a two-tailed Student's t test (\*P<0.05; \*\*P<0.01).

## Bioinformatics analysis

The cDNA and deduced amino acid sequence analyses were performed using DNASTAR software (DNASTAR Inc., [www.dnastar.com](http://www.dnastar.com)). The isoelectric point and molecular weight of the

deduced amino acid sequence were predicted using ExPASy ([http://www.expasy.org/tools/pi\\_tool.html](http://www.expasy.org/tools/pi_tool.html)). Conserved domains were predicted using NCBI website tools (<http://www.ncbi.nlm.nih.gov/Structure/cdd/wrpsb.cgi/>) [27]. SignalP tools (<http://www.cbs.dtu.dk/services/SignalP/>) were used to predict signal peptides [28], and the subcellular localization of the protein was also predicted (<http://www.bioinfo.tsinghua.edu.cn/SubLoc/>) [29]. Transmembrane protein topological structure was analyzed with TMHMM tools (<http://www.cbs.dtu.dk/services/TMHMM/>) [30], and a motif scan was performed ([http://hits.isb-sib.ch/cgi-bin/motif\\_scan](http://hits.isb-sib.ch/cgi-bin/motif_scan)) [31]. Predictions of N- and O-glycosylated sites were also performed (<http://www.cbs.dtu.dk/services/NetNGlyc/> and <http://www.cbs.dtu.dk/services/NetOGlyc/>) [32]. Homology analysis of the deduced amino acid sequence was performed using the BLAST tool in GenBank (Blastp). Multiple sequence alignments were performed using ClustalX software [33], and the protein structure prediction was performed using <http://swissmodel.expasy.org/interactive>. The unrooted tree was generated with TreeView Version 1.6.6 [34].

## Results

### Sequence analysis of the *ApSPZ* gene

We performed transcriptome sequencing on the Chinese oak silkworm *A. pernyi*, and high-quality reads were deposited in the NCBI SRA database (Accession numbers: SRR2919240, SRR2919241, SRR2919242 and SRR2919243). Assembly of the high quality reads was performed using the Trinity de novo assembly program. A unigene (comp748335\_c0) annotated *Manduca sexta* Spz1A (GenBank accession No.GQ249944.1) encoding 256 nucleotides was selected. Based the unigene sequence, a novel *spatzle* gene (*ApSPZ*) from *A. pernyi* was first identified using RT-PCR, 5' RACE and 3' RACE. The isolated *ApSPZ* cDNA was 1065 nucleotides with an open reading frame (ORF) of 777 bp that encodes a 258 amino acids protein. The cDNA sequence contains a 212 bp 5' -untranslated region (UTR) and a 76 bp 3'-UTR with a polyadenylation signal sequence (AATAAA) at position 1027 and a poly(A) tail. The initiation codon ATG and the termination codon TAA are at positions 213 and 987, respectively (Fig 1). The predicted molecular weight and isoelectric point (pI) of *ApSPZ* were 29.71 kDa and 8.53, respectively. *ApSPZ* was assigned its name because of its similarity to known *spatzle* proteins. This cDNA sequence has been deposited in GenBank under accession no. KU323402.

No conserved domains were identified for *ApSPZ*. The topological structural analysis of the trans-membrane protein showed that it contained no membrane helices. Prediction of subcellular localization by SubLoc indicated that the protein is nuclear (reliability index: RI = 5; expected accuracy = 94%). Protein signal peptide analysis showed that the deduced signal peptide cleavage site is between amino acids 22 and 23 (signal peptide probability: 0.601), indicating that *ApSPZ* is a secretory protein. The predictions of N- and O-glycosylated sites showed that the protein contains an N-glycosylated site at amino acid 54 and an O-glycosylated site at amino acid 15. Motif-scan results showed that the protein has a casein kinase II phosphorylation site, an N-myristoylation site, and a protein kinase C phosphorylation site.

### Sequence alignment and phylogenetic analysis

Homologous alignment of *spatzle* from *A. pernyi* (*ApSPZ*, KU323402), *Manduca sexta* (*MsSPZ*, ACU68553), *Drosophila melanogaster* (*DmSPZ*, NP\_524526), and *Bombyx mori* (*BmSPZ*, NP\_001108066) was performed using the Clustal X program (Fig 2). Sequence alignment showed that the amino acid sequence of *ApSPZ* is most similar to *MsSPZ*, with 40% identity, and the gene exhibited 33.15% identity with *BmSPZ* and 13.58% identity with *DmSPZ*. The putative activation cleavage site of *ApSPZ*, located after IAQR<sup>163</sup>, is conserved in *MsSPZ* and *BmSPZ*. An activating protease could cleave after the conserved residue Arg 163 in

```

1           CGCTACCCTTTTCGGTTGCTCCCTTCCCTCGGAGTCGTTATCTACAAACGTAGTCAGGTG
63      CATGTCTCGACGACATCAATTTTGTGGTCTGTACGTCAAAAGGATGCGTAATAAATATCGCGAGTTCAACATGAA
138     ATAGTTATTGGGTAACCAAAGCGCTTACAGTCCGCTCGTTTCTCTGTGTGTTTGTGCTGTATAGTTGAATAGTT
213     ATGTCATTATACGGCATATCTCCTTTTCTAAGTCTATGTCAACAAATCCATGGAGTCATGGTGTGGCATCA
      M S F I R H I L L F L T A M □ T N P W S H G V A S
288     GAGATCCCGCGGTACGGGTGCAGAGTCTTGATCAAAATTATTGACTTCCAGGATTTACATAAACTAGTATTT
      E I P R Y G V Q S L D Q N Y Y D F Q D L H K L V F
363     CGGTCTGCAAATGATTCAAACAGGCAGAATAATCAGAACGGTTTGTACAAGATTGCTACTGGGTTTACAAAGAAT
      R S A □ D S N R Q N N Q N G L Y K I V T G F T K N
438     ACAGTATCCGTAGCCAATAGACGAGGTCAACTAAAAGGCCATCGTCAATAGACAAAATTGTCTTCCCGGGACCA
      T V S V A N R R G Q L K E P S S I D K I V F P G P
513     GTAAGCGGATATACAAGGCGCTTTGACCTCGATATACCGGAGGAGTGCAGAAAATTGGGCTTCTCGAATCAGTT
      V S G Y T R R F D L D I P E E C E K L G F C E S V
588     CCTAATTACCCAATAAAGAAGTCAACGATGTTATTCTAAGAAAACAGAAAATTGAATCTCTTCCAAGTGGAT
      P N Y P N K E V N D V I S K K T E N L N L F Q V D
663     AAAGTGGATTTACCTGACACACCAGATATTGCGCAGAGGTTGGGCCCTCAAGAAGATCATATGGAAGTGTGTTCCG
      K L D L P D T P D I A Q R L G P Q E D H M E L C S
738     TCTAGGGAAAAGGTGATGTATCCAGAGGCTTTGCGAGACGACAACGGGAAGTGGCATGTAGTTATAAATCAAAA
      S R E K V M Y P E A L R D D N G K W H V V I N S K
813     GAAAAACCGTGCAAGGTTTGTAGAGTCGAAATTTGCGAATGTCCAGATCTTATGTCAACCCAGAACGAGTCCAGAA
      E K P V Q G F R V E I C E C P D L M S P R T S P E
888     AATGTACTCTTGAGCGATAGTCTTAGGATGAGGCGAGGCGTAGTCGCGGGAATACAAAGATTCCGTATGTTGACC
      N V L L S D S L R M R R G V V A G I Q R F R M L T
963     ACATATAACTTACGCAAGCGACGATTAAACCGATGAAGCATTAAATCATCTTGATAAATCATTGAAATAAACATT
      T Y N L R K R R *
1038    GTGAATAGCTAAAAAAAAAAAAAAAAAAAA
  
```

**Fig 1. cDNA sequence and deduced amino acid sequence of the ApSPZ gene.** Nucleotides are numbered on the left of each line. The deduced amino acid sequence is shown below the nucleotide sequence. The ATG initiation codon is in bold, and the TAA termination codon is in bold and marked with an asterisk. The potential polyadenylation AATAAA sequence near the end of the 3' untranslated region is underlined. The predicted signal peptide is wave underlined. This cDNA sequence has been deposited in GenBank under accession number KU323402.

doi:10.1371/journal.pone.0160200.g001

ApSPZ, similar to the confirmed cleavages in DmSPZ and MsSPZ [3,35]. The protein structure prediction showed that ApSPZ matched the template structure for 4bv4.1.A (PROTEIN SPAETZLE C-106). Although three Cys residues in the putative carboxyl-terminal active cystine knot domain in ApSPZ are conserved in *M. sexta*, *D. melanogaster* and *B. mori*, four other Cys residues were not found. The results were consistent with *D. melanogaster* Spz8.24, indicating that they are not involved in disulfide formation, and ApSPZ might be similar to DmSpz8.24, which is natively unfolded [3,36].

To assess the phylogenetic relationship between ApSPZ and other insect spatzle proteins, a total of 35 insect spatzle proteins of different spatzle types were collected from the GenBank database (S2 Table). The spatzle amino acid sequences from different insect species were first aligned using Clustal X [33]. The unrooted phylogenetic tree was generated with TreeView

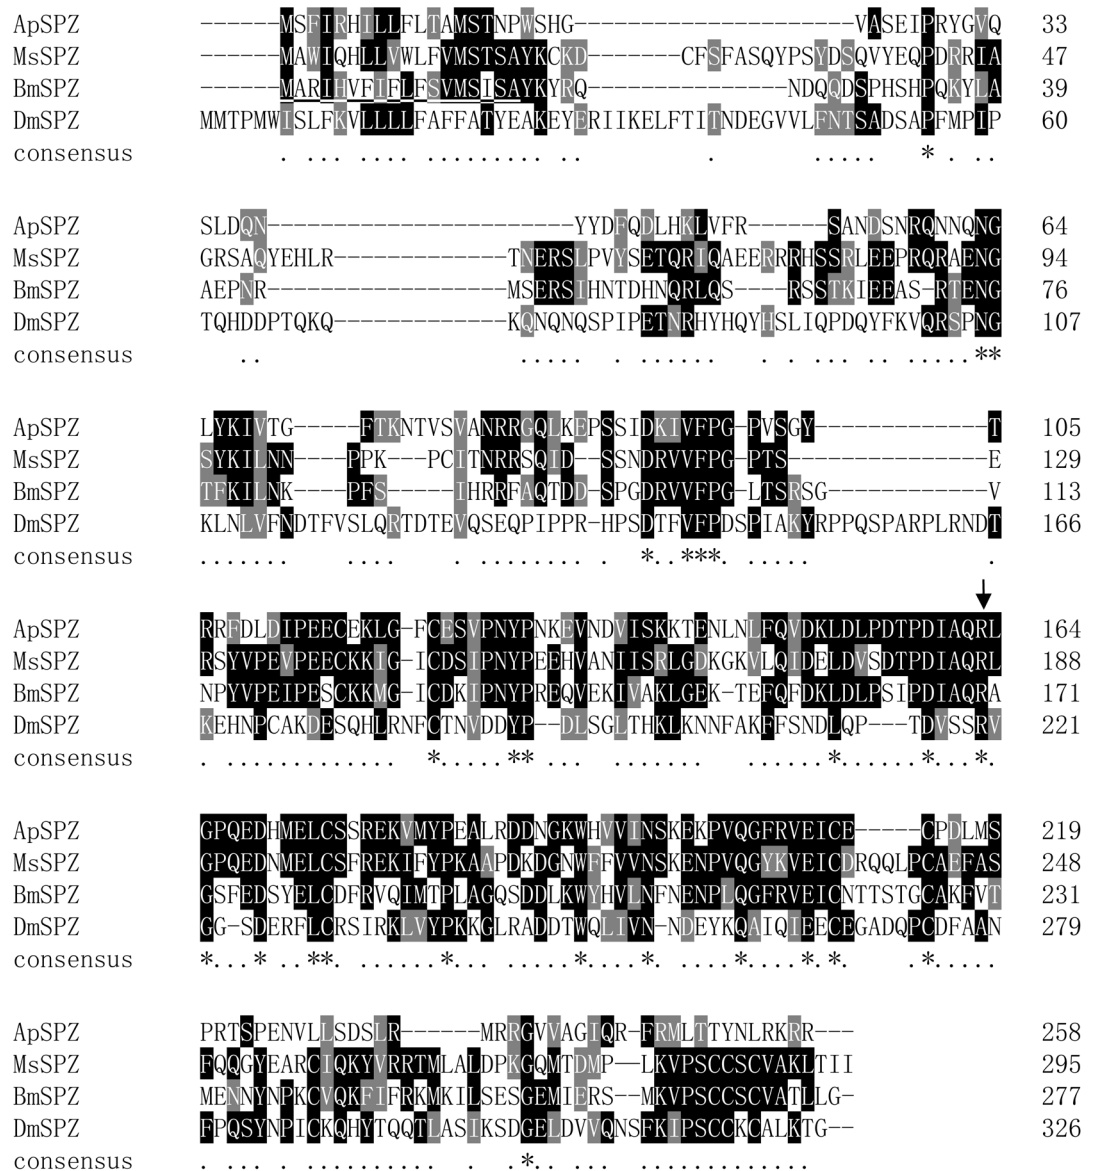

**Fig 2. Sequence alignment of spatzles from *A. pernyi* (ApSPZ), *M. sexta* (MsSPZ), *B. mori* and *D. melanogaster* (DmSPZ).** The amino acid alignment was generated by the Clustal X program. Amino acid residues are shaded as follows based on the conserved percent: 100%, ≥80%, ≥60% and <60% according to the default settings are indicated by white letters on black, white letters on dark grey, white letters on light grey and black letters on white, respectively. The predicted signal peptides of proteins from different organisms are underlined. The P1 residue at the activation cleavage site is completely conserved and is noted with an arrow. The GenBank accession numbers are MsSPZ, ACU68553; BmSPZ, NP\_001108066; and DmSPZ, NP\_524526.

doi:10.1371/journal.pone.0160200.g002

Version 1.6.6 [34], and it is shown in Fig 3. ApSPZ was most closely related to BmSPZ1 and MsSPZ1A and was assigned to the SPZ1 group with other insect SPZ1 proteins. Moreover, different types of insect spatzles were assigned to corresponding groups. *Tribolium castaneum* Spatzle5 (TcSPZ5) has a lower degree of sequence conservation with other insect SPZ5 proteins. In conclusion, ApSPZ might be a new member of the spatzle type 1 family within the spatzle superfamily.

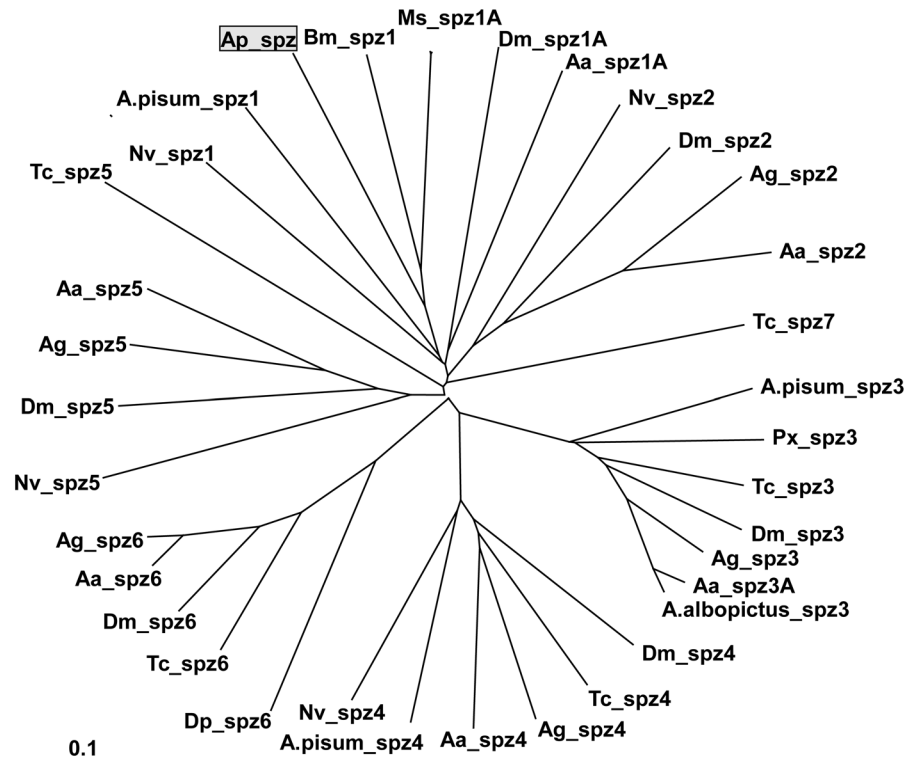

**Fig 3. Phylogenetic analysis of the spatzles from *A. pernyi* and other insect species.** The abbreviations and the GenBank accession numbers of the spatzles are shown in [S2 Table](#).

doi:10.1371/journal.pone.0160200.g003

### Relative mRNA expression patterns of genes involved in the Toll pathway

Semi-quantitative RT-PCR was performed to examine the expression of genes involved in the Toll pathway in different developmental stages and various tissues of the *A. pernyi* 5th instar larvae ([Fig 4](#)). In addition to *A. pernyi spatzle*, the genes selected were *A. pernyi GNBP* (GenBank accession No. KF725771), *A. pernyi MyD88* (GenBank accession No. KF670143), *A. pernyi Tolloid* (GenBank accession No. KF670144), *A. pernyi cactus* (GenBank accession No. KF670142) and *A. pernyi dorsalA* (GenBank accession No. JF488068). To standardize the templates, *Apactin* was used as an internal control [[25](#)]. RT-PCR was performed with the specific primer pairs (shown in [S1 Table](#)) for the each gene.

As shown in [Fig 4A](#), the *A. pernyi GNBP* gene was expressed in larvae and pupae during four developmental stages. *ApGNBP* was expressed in all of the tissues examined except for the midgut, and the highest mRNA levels were found in the epidermis and fat body. GNBP is a pattern recognition protein that enables the host to detect invading bacteria [[37](#)]. GNBP and the peptidoglycan recognition protein SA (PGRP-SA) jointly activate the Toll pathway against gram-positive bacterial infections in *Drosophila* [[1,38](#)]. *A. pernyi spatzle* (*ApSPZ*) was expressed during four developmental stages, including eggs, larvae, pupae and moths, indicating that *ApSPZ* has an important role throughout the entire life cycle of *A. pernyi*. The highest mRNA levels were observed in the larval stage. *ApSPZ* was expressed in all of the tissues examined except the midgut, and the highest mRNA levels were found in the fat body and muscle ([Fig 4B](#)). *A. pernyi Tolloid* (*ApToll*) mRNA was only expressed in the pupae stage and not in the larvae, which might be due to whole larva sampling. *ApToll* was expressed in Malpighian tubules



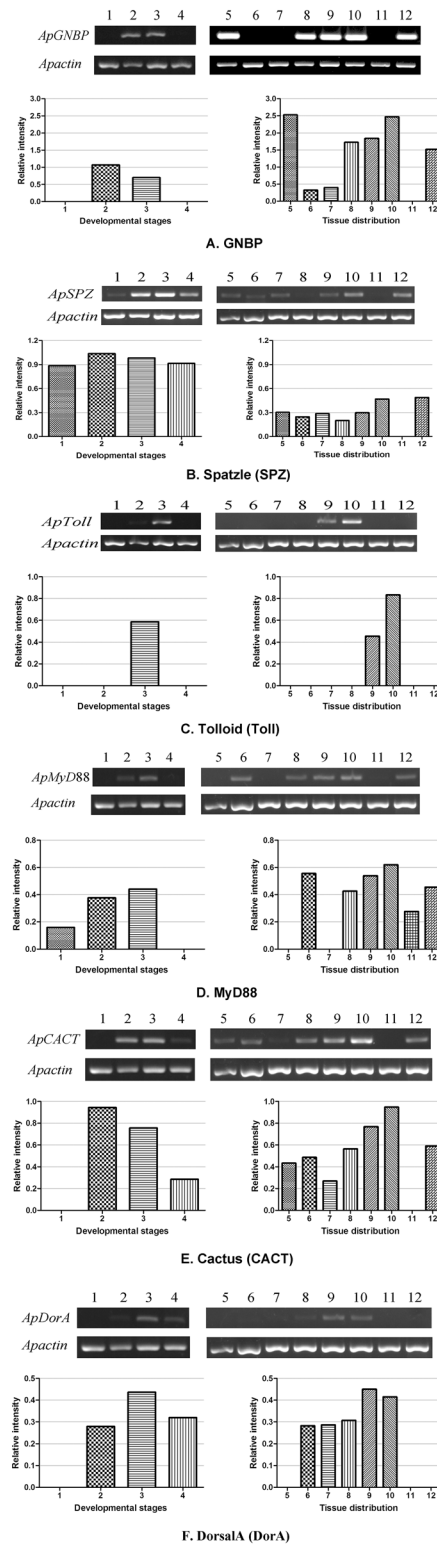

**Fig 4. Expression and relative intensity of genes in the Toll pathway during different developmental stages and in different tissues of 5<sup>th</sup> instar larvae in *A. pernyi*.** Lane 1, eggs on the 5<sup>th</sup> day; lane 2, 5<sup>th</sup> instar larvae; lane 3, pupae; lane 4, moths; lane 5, epidermis; lane 6, silk gland; lane 7, blood; lane 8, gonads; lane 9, Malpighian tubules; lane 10, fat body; lane 11, midgut; lane 12, muscle.

doi:10.1371/journal.pone.0160200.g004

and the fat body, and the highest mRNA levels were observed in the fat body (Fig 4C). *A. pernyi Tolloid* is a Toll family member and could be assigned to the Toll-1 group with *D. melanogaster Tolloid* (GenBank accession No. AAF56329). *D. melanogaster Tolloid* was detected in blood cells and the fat body, but no transcripts were found in the lymph gland [39]. *A. pernyi MyD88* (*ApMyD88*) was expressed in the eggs, larvae and pupae. *ApMyD88* was expressed in all of the tissues examined except for the epidermis and blood, and the highest mRNA levels were found in the fat body (Fig 4D). *A. pernyi cactus* (*ApCACT*) was expressed in the larvae, pupae and moths, and *ApCACT* was expressed in all of the tissues examined except for the midgut. Transcript levels were most abundant in the fat body (Fig 4E). The *A. pernyi dorsala* (*ApDorA*) gene was expressed in the larvae, pupae and moths. *ApDorA* was expressed in the silk gland, blood, spermary/ovary, Malpighian tubules and fat body and was not detected in the epidermis, midgut and muscle. Moreover, the highest mRNA levels were found in the Malpighian tubules and the fat body (Fig 4F), which was consistent with a previous study [24].

The genes involved in the Toll pathway were predominantly expressed in immune-responsive fat body tissue, indicating that these genes play a crucial role in *A. pernyi* innate immunity. Further studies of these genes are underway to clarify the immune response of *A. pernyi* against infection by microorganisms.

### Toll pathway immunity in *A. pernyi* against pathogenic microorganisms

To investigate the role of the *A. pernyi* Toll signaling pathway in the response to different pathogens, the relative mRNA levels of genes in the Toll pathway were assessed by qRT-PCR after *A. pernyi* was challenged by different pathogenic microorganisms.

As shown in Fig 5, after infection with different pathogenic microorganisms, significant changes were observed in the transcriptional levels of Toll pathway genes in *A. pernyi*.

In this study, the expression levels of *ApGNBP* were significantly elevated in *A. pernyi* compared to CK after 24 h of infection with a gram-positive bacterium (Ep) ( $P < 0.05$ ) and fungus (Np) ( $P < 0.01$ ). After infection with Np, *ApGNBP* expression continued to increase, exhibiting a 10-fold change compared to CK at 48 h ( $P < 0.01$ ). However, no significant change was observed in *A. pernyi* after infection with *E. coli*. The transcriptional levels of *ApSPZ* were obviously increased in *A. pernyi* at 24 h ( $P < 0.01$ ) but were similar to CK 48 h ( $P > 0.05$ ) after infection with Ep. The expression levels of *ApSPZ* in *A. pernyi* infected with Np were elevated, and there was no significant difference compared to CK at 24 h ( $P > 0.05$ ). However, levels were significantly different compared to CK at 48 h ( $P < 0.05$ ). Meanwhile, no significant differences were observed in *A. pernyi* after infection with a gram-negative bacterium (Ec). *ApToll* levels were slightly increased in *A. pernyi* at 24 h, but this was not significant ( $P > 0.05$ ), and they were similar to CK 48 h ( $P > 0.05$ ) after infection with Ep. The expression levels of *ApToll* in *A. pernyi* infected by Np were increased, and there was a significant difference at 24 h ( $P < 0.05$ ) and 48 h ( $P < 0.05$ ) compared to CK. There was no significant change between *A. pernyi* infected with Ec and CK. The levels of *ApMyD88* were significantly increased in *A. pernyi* at 24 h ( $P < 0.05$ ) and were similar to CK at 48 h ( $P > 0.05$ ) after infection with Ep. Following infection with Np, *ApMyD88* levels were increased, and they were significantly different at 48 h ( $P < 0.01$ ) compared to CK, although there was no significant change at 24 h ( $P > 0.05$ ). There were no significant differences between *A. pernyi* infected with Ec and CK, and the expression level of *ApMyD88* in *A. pernyi* infected with Ec was slightly decreased at 48 h. The expression levels of *ApCACT* were significantly elevated in *A. pernyi* at 24 h after infection with Ep ( $P < 0.05$ ) and Np ( $P < 0.05$ ), and the effect of Ep on *A. pernyi* was greater than that of Np, but no significant difference was observed in *A. pernyi* infected with Ec. Forty-eight hours after inoculation, there were significant increases in gene expression only in *A. pernyi* infected with

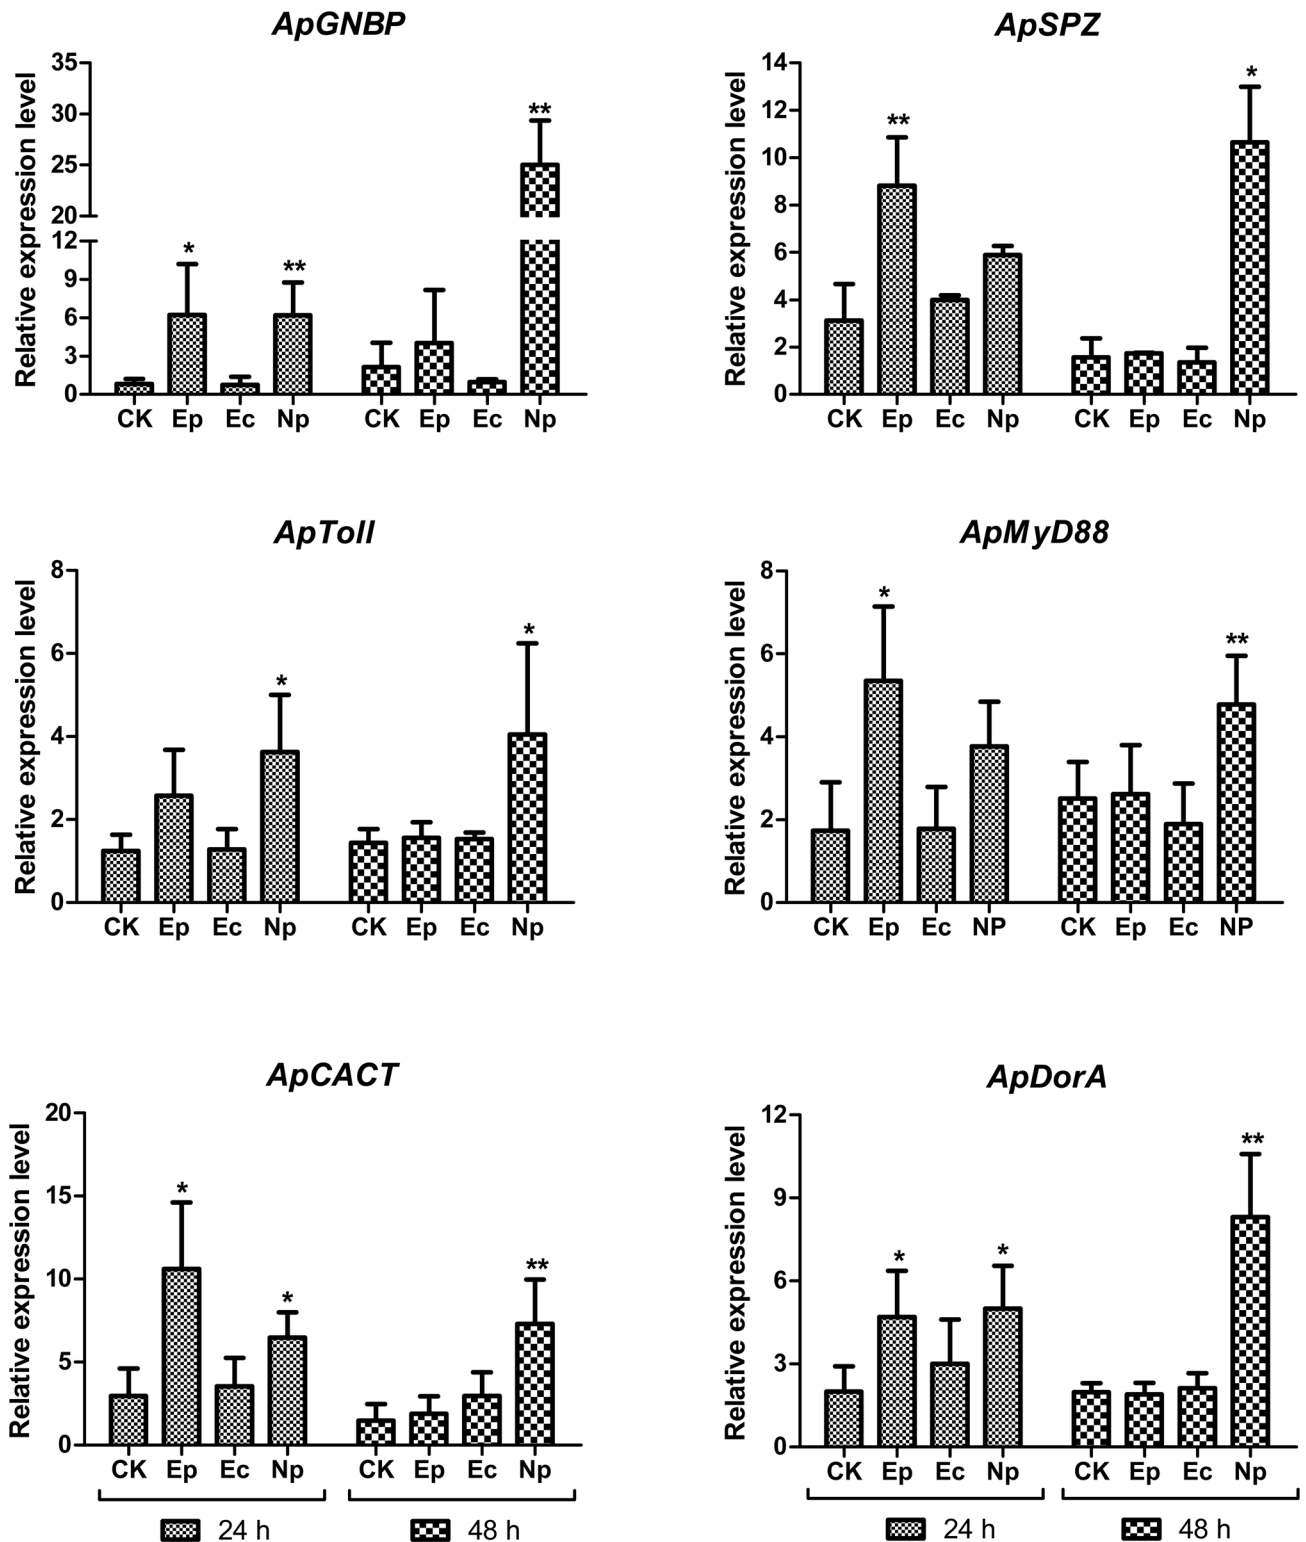

**Fig 5. Relative mRNA levels of genes in the Toll pathway were detected by qRT-PCR in *A. pernyi* treated with pathogenic microorganisms.** The fifth instar larvae were inoculated by oral feeding with *Escherichia coli* (Ec), *Enterococcus pernyi* (Ep), or *Nosema pernyi* (Np) on the first day, and larvae fed sterile water were used as control samples (CK). Fat bodies dissected from each group for RNA extraction 24 h and 48 h after inoculation were used for qRT-PCR testing.

doi:10.1371/journal.pone.0160200.g005

Np ( $P < 0.01$ ), whereas other groups showed slightly elevated expression but no significant differences. The expression levels of *ApDorA* were significantly increased in *A. pernyi* 24 h after infection with Ep ( $P < 0.05$ ) and Np ( $P < 0.05$ ), and there was a sharp increase 48 h after infection with Np ( $P < 0.01$ ); however, no significant differences were observed in *A. pernyi* after infection with Ec.

The expression analysis of Toll pathway genes associated with *A. pernyi* orally infected with fungi (Np), gram-positive bacteria (Ep) and gram-negative (Ec) bacteria revealed specific interactions between host immunity and pathogens, indicating that the Toll pathway could be activated by challenge with Np and Ep. However, no significant differences in Toll pathway genes were observed in *A. pernyi* after infection with Ec, indicating that the Toll pathway does respond to gram-negative bacteria.

In summary, the Toll signaling pathway in *A. pernyi* was activated by fungi and gram-positive bacteria but not by gram-negative bacteria.

## Discussion and Conclusions

The Toll signaling pathway plays a crucial role in the insect innate immune response against gram-positive bacteria, fungi and viruses [1–5]. Although it has been shown that the Toll pathway can be activated to release antimicrobial peptides to defend against microorganism invasion in many insects, there have been no reports investigating the Toll pathway in *A. pernyi*. Spatzle is a key protein that only requires an endogenous cytokine ligand for activation and signaling of the Toll pathway. Spatzle is a maternal effect gene that establishes the dorsal-ventral pattern of the *Drosophila* embryo and is required for Toll pathway signaling [40]. Spatzle is also a key signal transducer for immune responses [41]. It has an important function as a ligand for Toll receptors, and spatzle must be cleaved to stimulate Toll-dependent immunity-related gene expression. Moreover, spatzle is processed by trypsin or proteinase to release the cysteine knot domain for interaction with Toll receptors [2,3,42–44]. In this study, cloning, sequencing and expression analysis of the *A. pernyi* spatzle (*ApSPZ*) gene were performed. The *ApSPZ* ORF is 777 bp and encodes a 258 amino acids protein. Analysis indicated that *ApSPZ* is a nuclear and secretory protein. Sequence alignment demonstrated that *ApSPZ* has a putative activation cleavage site located after IAQR<sup>163</sup>, indicating that an activating protease would cleave after this specific Arg residue, which is similar to *DmSPZ* [35] and *MsSPZ* [3]. Only three Cys residues in the putative carboxyl-terminal active cystine knot domain of *ApSPZ* were conserved compared to spatzles from *M. sexta*, *D. melanogaster* and *B. mori* [3]. The results agree with the structure of *D. melanogaster* SPZ8.24, suggesting that they are not involved in disulfide formation. *ApSPZ* might be similar to *DmSpz8.24*, which is natively unfolded [36]. Phylogenetic analysis showed that *ApSPZ* was most closely related to *BmSPZ1* and *MsSPZ1A*, indicating that *ApSPZ* is a new member of the spatzle type 1 family. Furthermore, the expression patterns of genes involved in the Toll pathway were analyzed, and the results showed that only *ApSPZ* was expressed in all four developmental stages, indicating that the *ApSPZ* plays an important role throughout the entire life cycle of *A. pernyi*. Possibly due to whole larva sampling, all of the genes were detected during the larval stage except for *ApToll*. The tissue distribution indicated that these genes were predominantly expressed in immune-responsive fat body tissue, indicating that these genes play a crucial role in the innate immunity of *A. pernyi*. Furthermore, according to the qRT-PCR results, the relative mRNA levels of most genes in the Toll pathway were significantly different from the control 24 h or 48 h after *A. pernyi* was challenged by the fungus *N. pernyi* and the gram-positive bacterium *E. pernyi*. The mRNA levels of these genes were elevated but not significantly different in *A. pernyi* after infection with *E. coli*, indicating that the Toll pathway does not respond to gram-negative bacteria. These results were consistent with previous studies [45,46].

In conclusion, a novel spätzle belonging to the spätzle type 1 family from *A. pernyi* has been identified. *ApSPZ* was expressed during all developmental stages of *A. pernyi*. Other genes associated with the Toll pathway were mainly expressed in the fat body, suggesting that the Toll pathway is important in the *A. pernyi* innate immune system for defending against pathogenic microorganisms. Moreover, infection of *A. pernyi* with the fungus *N. pernyi* and the gram-positive bacterium *E. pernyi* but not by the gram-negative bacterium *E. coli* activates the Toll signaling pathway.

## Supporting Information

### S1 Fig. Different developmental stages of *A. pernyi*.

(TIF)

### S2 Fig. Survival conditions of *A. pernyi* larvae.

(TIF)

### S1 Table. Sequences of primers used in this paper.

(PDF)

### S2 Table. Information on spätzles from different insect species used in Fig 3.

(PDF)

## Author Contributions

**Conceived and designed the experiments:** YS ZY LQ.

**Performed the experiments:** YS YJ.

**Analyzed the data:** YS YJ YW.

**Contributed reagents/materials/analysis tools:** XL RY.

**Wrote the paper:** YS YJ.

## References

1. Akira S, Uematsu S, Takeuchi O. Pathogen recognition and innate immunity. *Cell*. 2006; 124: 783–801. doi: [10.1016/j.cell.2006.02.015](https://doi.org/10.1016/j.cell.2006.02.015) PMID: [16497588](https://pubmed.ncbi.nlm.nih.gov/16497588/).
2. Wang Y, Cheng T, Rayaprolu S, Zou Z, Xia Q, Xiang Z, et al. Proteolytic activation of pro-spätzle is required for the induced transcription of antimicrobial peptide genes in lepidopteran insects. *Dev Comp Immunol*. 2007; 31: 1002–1012. doi: [10.1016/j.dci.2007.01.001](https://doi.org/10.1016/j.dci.2007.01.001) PMID: [17337053](https://pubmed.ncbi.nlm.nih.gov/17337053/).
3. An C, Jiang H, Kanost MR. Proteolytic activation and function of the cytokine Spätzle in the innate immune response of a lepidopteran insect, *Manduca sexta*. *FEBS J*. 2010; 277: 148–162. doi: [10.1111/j.1742-4658.2009.07465.x](https://doi.org/10.1111/j.1742-4658.2009.07465.x) PMID: [19968713](https://pubmed.ncbi.nlm.nih.gov/19968713/).
4. Zambon RA, Nandakumar M, Vakharia VN, Wu LP. The toll pathway is important for an antiviral response in drosophila. *Proc Natl Acad Sci U S A*. 2005; 102: 7257–7262. doi: [10.1073/pnas.0409181102](https://doi.org/10.1073/pnas.0409181102) PMID: [15878994](https://pubmed.ncbi.nlm.nih.gov/15878994/).
5. Ferreira ÁG, Naylor H, Esteves SS, Pais IS, Martins NE, Teixeira L. The toll-dorsal pathway is required for resistance to viral oral infection in drosophila. *PLOS Pathog*. 2014; 10: e1004507. doi: [10.1371/journal.ppat.1004507](https://doi.org/10.1371/journal.ppat.1004507) PMID: [25473839](https://pubmed.ncbi.nlm.nih.gov/25473839/).
6. Liu Y, Li Y, Li X, Qin L. The origin and dispersal of the domesticated Chinese oak silkworm, *Antheraea pernyi*, in China: a reconstruction based on ancient texts. *J Insect Sci*. 2010; 10: 180. doi: [10.1673/031.010.14140](https://doi.org/10.1673/031.010.14140) PMID: [21062145](https://pubmed.ncbi.nlm.nih.gov/21062145/).
7. Qin L, Wang H, Jiang Y. Advance in *Antheraea pernyi* genetics and breeding in China. *Journal of Shenyang Agricultural University*. 2006; 37(5): 677–682. doi: [10.3969/j.issn.1000-1700.2006.05.002](https://doi.org/10.3969/j.issn.1000-1700.2006.05.002)

8. Wang J, Zhang S, Xing T, Kundu B, Li M, Kundu SC, et al. Ion-induced fabrication of silk fibroin nanoparticles from Chinese oak tasar *Antheraea pernyi*. *Int J Biol Macromol*. 2015; 79: 316–325. doi: [10.1016/j.ijbiomac.2015.04.052](https://doi.org/10.1016/j.ijbiomac.2015.04.052) PMID: [25936281](https://pubmed.ncbi.nlm.nih.gov/25936281/)
9. Zhu J, Fan D, Zhao J, Zhang H, Huang J, Zhou W, et al. Enhancement of the gelation properties of surimi from yellowtail Seabream (*Parargyrops edita*, Sparidae) with Chinese Oak silkworm pupa, *Antheraea pernyi*. *J Food Sci*. 2016; 81: E396–E403. doi: [10.1111/1750-3841.13184](https://doi.org/10.1111/1750-3841.13184) PMID: [26709730](https://pubmed.ncbi.nlm.nih.gov/26709730/)
10. Li YP, Xia RX, Wang H, Li XS, Liu YQ, Wei ZJ, et al. Construction of a full-length cDNA Library from Chinese oak silkworm pupa and identification of a KK-42-binding protein gene in relation to pupa-diapause termination. *Int J Biol Sci*. 2009; 5: 451–457. doi: [10.7150/ijbs.5.451](https://doi.org/10.7150/ijbs.5.451) PMID: [19564928](https://pubmed.ncbi.nlm.nih.gov/19564928/)
11. Liu Y, Chen M, Su J, Ma H, Zheng X, Li Q, et al. Identification and characterization of a novel Microvitellogenin from the Chinese Oak silkworm *Antheraea pernyi*. *PLOS ONE*. 2015; 10: e0131751. doi: [10.1371/journal.pone.0131751](https://doi.org/10.1371/journal.pone.0131751) PMID: [26126120](https://pubmed.ncbi.nlm.nih.gov/26126120/)
12. Liu QN, Zhu BJ, Wang L, Wei GQ, Dai LS, Lin KZ, et al. Identification of immune response-related genes in the Chinese oak silkworm, *Antheraea pernyi* by suppression subtractive hybridization. *J Invertebr Pathol*. 2013; 114: 313–323. doi: [10.1016/j.jip.2013.09.004](https://doi.org/10.1016/j.jip.2013.09.004) PMID: [24076149](https://pubmed.ncbi.nlm.nih.gov/24076149/)
13. Liu QN, Zhu BJ, Dai LS, Fu WW, Lin KZ, Liu CL. Overexpression of small heat shock protein 21 protects the Chinese oak silkworm *Antheraea pernyi* against thermal stress. *J Insect Physiol*. 2013; 59: 848–854. doi: [10.1016/j.jinsphys.2013.06.001](https://doi.org/10.1016/j.jinsphys.2013.06.001) PMID: [23763950](https://pubmed.ncbi.nlm.nih.gov/23763950/)
14. Zhang C, Dai L, Wang L, Qian C, Wei G, Li J, et al. 2015 Inhibitors of eicosanoid biosynthesis influencing the transcripts level of sHSP21.4 gene induced by pathogen infections, in *Antheraea pernyi*. *PLoS One*. 2015; 10: e0121296. doi: [10.1371/journal.pone.0121296](https://doi.org/10.1371/journal.pone.0121296) PMID: [25844646](https://pubmed.ncbi.nlm.nih.gov/25844646/)
15. Zhang CF, Dai LS, Wang L, Qian C, Wei GQ, Li J, et al. Eicosanoids mediate sHSP 20.8 gene response to biotic stress in larvae of the Chinese oak silkworm *Antheraea pernyi*. *Gene*. 2015; 562: 32–39. doi: [10.1016/j.gene.2014.12.035](https://doi.org/10.1016/j.gene.2014.12.035) PMID: [25527122](https://pubmed.ncbi.nlm.nih.gov/25527122/)
16. Liu QN, Lin KZ, Yang LN, Dai LS, Wang L, Sun Y, et al. Molecular characterization of an Apolipoprotein III gene from the Chinese oak silkworm, *Antheraea pernyi* (Lepidoptera: Saturniidae). *Arch Insect Biochem Physiol*. 2015; 88: 155–167. doi: [10.1002/arch.21210](https://doi.org/10.1002/arch.21210) PMID: [25348706](https://pubmed.ncbi.nlm.nih.gov/25348706/)
17. Qu XM, Zhang CF, Komano H, Natori S. Purification of a lectin from the hemolymph of Chinese oak silkworm (*Antheraea pernyi*) pupae. *J Biochem*. 1987; 101: 545–551 doi: [10.1093/jb/101.3.545](https://doi.org/10.1093/jb/101.3.545) PMID: [3298221](https://pubmed.ncbi.nlm.nih.gov/3298221/)
18. Li F, Terenius O, Li Y, Fang S, Li W. cDNA cloning and expression analysis of pattern recognition proteins from the Chinese Oak Silkworm, *Antheraea pernyi*. *Insects*. 2012; 3: 1093–1104. doi: [10.3390/insects3041093](https://doi.org/10.3390/insects3041093) PMID: [26466728](https://pubmed.ncbi.nlm.nih.gov/26466728/)
19. Youlei M, Jinghai Z, Yuntao Z, Jiaoshu L, Tianyi W, Chunfu W, et al. Purification and characterization of a 1,3-β-D-glucan recognition protein from *Antheraea pernyi* larvae that is regulated after a specific immune challenge. *BMB Rep*. 2013; 46: 264–269. doi: [10.5483/BMBRep.2013.46.5.222](https://doi.org/10.5483/BMBRep.2013.46.5.222) PMID: [23710637](https://pubmed.ncbi.nlm.nih.gov/23710637/)
20. Xialu W, Jinghai Z, Ying C, Youlei M, Wenjun Z, Guoyuan D, et al. A novel pattern recognition protein of the Chinese oak silkworm, *Antheraea pernyi*, is involved in the pro-PO activating system. *BMB Rep*. 2013; 46: 358–363. doi: [10.5483/BMBRep.2013.46.7.009](https://doi.org/10.5483/BMBRep.2013.46.7.009) PMID: [23884102](https://pubmed.ncbi.nlm.nih.gov/23884102/)
21. Lu WX, Yue D, Hai ZJ, Daihua W, Yi ZM, Fu WC, et al. Cloning, expression, and characterization of prophenoloxidase from *Antheraea pernyi*. *Arch Insect Biochem Physiol*. 2015; 88: 45–63. doi: [10.1002/arch.21219](https://doi.org/10.1002/arch.21219) PMID: [25521627](https://pubmed.ncbi.nlm.nih.gov/25521627/)
22. Li W, Terenius O, Hirai M, Nilsson AS, Faye I. Cloning, expression and phylogenetic analysis of Hemolin, from the Chinese oak silkworm, *Antheraea pernyi*. *Dev Comp Immunol*. 2005; 29: 853–864 doi: [10.1016/j.dci.2005.02.003](https://doi.org/10.1016/j.dci.2005.02.003) PMID: [15978282](https://pubmed.ncbi.nlm.nih.gov/15978282/)
23. Hirai M, Terenius O, Li W, Faye I. 2004. Baculovirus and dsRNA induce Hemolin, but no antibacterial activity, in *Antheraea pernyi*. *Insect Mol Biol*. 2004; 13: 399–405 doi: [10.1111/j.0962-1075.2004.00497.x](https://doi.org/10.1111/j.0962-1075.2004.00497.x) PMID: [15271212](https://pubmed.ncbi.nlm.nih.gov/15271212/)
24. Li WL, Liu Y, Li FJ, Li YJ. Cloning, identification and expressional analysis of immunity related genes Apdorasa1 from *Antheraea pernyi*. *Science of Sericulture*. 2014; 40: 32–37.
25. Wu S, Xuan ZX, Li YP, Li Q, Xia RX, Shi SL, et al. Cloning and characterization of the first actin gene in Chinese oak silkworm, *Antheraea pernyi*. *Afr J Agric Res*. 2010; 10: 1095–1100.
26. Livak KJ, Schmittgen TD. Analysis of relative gene expression data using real-time quantitative PCR and the 2<sup>-</sup>(Delta Delta C(T)) method. *Methods*. 2001; 25: 402–408. doi: [10.1006/meth.2001.1262](https://doi.org/10.1006/meth.2001.1262) PMID: [11846609](https://pubmed.ncbi.nlm.nih.gov/11846609/)
27. Marchler-Bauer A, Derbyshire MK, Gonzales NR, Lu S, Chitsaz F, Geer LY, et al. CDD: NCBI's conserved domain database. *Nucleic Acids Res*. 2015; 43(DI): D222–D226. doi: [10.1093/nar/gku1221](https://doi.org/10.1093/nar/gku1221)

28. Petersen TN, Brunak S, von Heijne G, Nielsen H, Signal P. 4.0: discriminating signal peptides from transmembrane regions. *Nat Methods*. 2011; 8: 785–786. doi: [10.1038/nmeth.1701](https://doi.org/10.1038/nmeth.1701) PMID: [21959131](https://pubmed.ncbi.nlm.nih.gov/21959131/)
29. Hua S, Sun Z. Support vector machine approach for protein subcellular localization prediction. *Bioinformatics*. 2001; 17: 721–728. doi: [10.1093/bioinformatics/17.8.721](https://doi.org/10.1093/bioinformatics/17.8.721) PMID: [11524373](https://pubmed.ncbi.nlm.nih.gov/11524373/)
30. Sonnhammer EL, von Heijne G, Krogh A. A hidden Markov model for predicting transmembrane helices in protein sequences. *Proc Int Conf Intell Syst Mol Biol*. 1998; 6: 175–182. PMID: [9783223](https://pubmed.ncbi.nlm.nih.gov/9783223/)
31. Pagni M, Ioannidis V, Cerutti L, Zahn-Zabal M, Jongeneel CV, Hau J, et al. MyHits: improvements to an interactive resource for analyzing protein sequences. *Nucleic Acids Res*. 2007; 35(Suppl 2): W433–W437. doi: [10.1093/nar/gkm352](https://doi.org/10.1093/nar/gkm352)
32. Steentoft C, Vakhrushev SY, Joshi HJ, Kong Y, Vester-Christensen MB, Schjoldager KT, et al. Precision mapping of the human O-GalNAc glycoproteome through SimpleCell technology. *EMBO J*. 2013; 32: 1478–1488. doi: [10.1038/emboj.2013.79](https://doi.org/10.1038/emboj.2013.79) PMID: [23584533](https://pubmed.ncbi.nlm.nih.gov/23584533/)
33. Thompson JD, Gibson TJ, Plewniak F, Jeanmougin F, Higgins DG. The CLUSTAL\_X windows interface: flexible strategies for multiple sequence alignment aided by quality analysis tools. *Nucleic Acids Res*. 1997; 25: 4876–4882. doi: [10.1093/nar/25.24.4876](https://doi.org/10.1093/nar/25.24.4876) PMID: [9396791](https://pubmed.ncbi.nlm.nih.gov/9396791/)
34. Page RD. TreeView: an application to display phylogenetic trees on personal computers. *Comput Appl Biosci*. 1996; 12: 357–358. PMID: [8902363](https://pubmed.ncbi.nlm.nih.gov/8902363/)
35. DeLotto Y, Smith C, DeLotto R. Multiple isoforms of the *Drosophila* Spätzle protein are encoded by alternatively spliced maternal mRNAs in the precellular blastoderm embryo. *Mol Gen Genet*. 2001; 264: 643–652. doi: [10.1007/s004380000350](https://doi.org/10.1007/s004380000350) PMID: [11212919](https://pubmed.ncbi.nlm.nih.gov/11212919/)
36. Hoffmann A, Funkner A, Neumann P, Juhnke S, Walther M, Schierhorn A, et al. Biophysical characterization of refolded *drosophila* Spätzle, a cystine knot protein, reveals distinct properties of three isoforms. *J Biol Chem*. 2008; 283: 32598–32609. doi: [10.1074/jbc.M801815200](https://doi.org/10.1074/jbc.M801815200) PMID: [18790733](https://pubmed.ncbi.nlm.nih.gov/18790733/)
37. Kurata S. Peptidoglycan recognition proteins in *drosophila* immunity. *Dev Comp Immunol*. 2014; 42: 36–41. doi: [10.1016/j.dci.2013.06.006](https://doi.org/10.1016/j.dci.2013.06.006) PMID: [23796791](https://pubmed.ncbi.nlm.nih.gov/23796791/)
38. Gobert V, Gottar M, Matskevich AA, Rutschmann S, Royet J, Belvin M, et al. Dual activation of the *drosophila* toll pathway by two pattern recognition receptors. *Science*. 2003; 302: 2126–2130. doi: [10.1126/science.1085432](https://doi.org/10.1126/science.1085432) PMID: [14684822](https://pubmed.ncbi.nlm.nih.gov/14684822/)
39. Kambris Z, Hoffmann JA, Imler JL, Capovilla M. Tissue and stage-specific expression of the tolls in *drosophila* embryos. *Gene Expr Patterns*. 2002; 2: 311–317. doi: [10.1016/S1567-133X\(02\)00020-0](https://doi.org/10.1016/S1567-133X(02)00020-0) PMID: [12617819](https://pubmed.ncbi.nlm.nih.gov/12617819/)
40. Anderson KV. Toll signaling pathways in the innate immune response. *Curr Opin Immunol*. 2000; 12: 13–19. doi: [10.1016/S0952-7915\(99\)00045-X](https://doi.org/10.1016/S0952-7915(99)00045-X) PMID: [10679407](https://pubmed.ncbi.nlm.nih.gov/10679407/)
41. Wang L, Ligoxygakis P. Pathogen recognition and signalling in the *drosophila* innate immune response. *Immunobiology*. 2006; 211: 251–261. doi: [10.1016/j.imbio.2006.01.001](https://doi.org/10.1016/j.imbio.2006.01.001) PMID: [16697918](https://pubmed.ncbi.nlm.nih.gov/16697918/)
42. Morisato D, Anderson KV. The spätzle gene encodes a component of the extracellular signaling pathway establishing the dorsal-ventral pattern of the *drosophila* embryo. *Cell*. 1994; 76: 677–688. doi: [10.1016/0092-8674\(94\)90507-X](https://doi.org/10.1016/0092-8674(94)90507-X) PMID: [8124709](https://pubmed.ncbi.nlm.nih.gov/8124709/)
43. Hu X, Yagi Y, Tanji T, Zhou S, Ip YT. Multimerization and interaction of toll and Spätzle in *drosophila*. *Proc Natl Acad Sci USA*. 2004; 101: 9369–9374. doi: [10.1073/pnas.0307062101](https://doi.org/10.1073/pnas.0307062101) PMID: [15197269](https://pubmed.ncbi.nlm.nih.gov/15197269/)
44. Stelter M, Fandrich U, Franzke K, Schierhorn A, Breithaupt C, Parthier C, et al. High level expression of the *drosophila* toll receptor ectodomain and crystallization of its complex with the morphogen Spätzle. *Biol Chem*. 2013; 394: 1091–1096. doi: [10.1515/hsz-2013-0136](https://doi.org/10.1515/hsz-2013-0136) PMID: [23729564](https://pubmed.ncbi.nlm.nih.gov/23729564/)
45. Wu S, Zhang X, He Y, Shuai J, Chen X, Ling E. Expression of antimicrobial peptide genes in *Bombyx mori* gut modulated by oral bacterial infection and development. *Dev Comp Immunol*. 2010; 34: 1191–1198. doi: [10.1016/j.dci.2010.06.013](https://doi.org/10.1016/j.dci.2010.06.013) PMID: [20600274](https://pubmed.ncbi.nlm.nih.gov/20600274/)
46. Liu W, Liu J, Lu Y, Gong Y, Zhu M, Chen F, et al. Immune signaling pathways activated in response to different pathogenic micro-organisms in *Bombyx mori*. *Mol Immunol*. 2015; 65: 391–397. doi: [10.1016/j.molimm.2015.02.018](https://doi.org/10.1016/j.molimm.2015.02.018) PMID: [25745806](https://pubmed.ncbi.nlm.nih.gov/25745806/)
